# Supplementary material
Source: publisher site journal article supplement (https://www.dovepress.com/article/305308)
Supplement: Supplementary file 1 [file get_supplementary_file.php]

**SUPPLEMENTARY INFORMATION TO:**

**Safety, Tolerability, Pharmacokinetics, and Pharmacodynamics of the MK2 Inhibitor ATI-450 in Healthy Subjects:
A Placebo-Controlled, Randomized Phase 1 Study**

David Gordon, Edward T. Hellriegel, Heidi Rath Hope, David Burt, Joe Monahan

**Methods**

ATI-450 bioanalysis assay

## Sample preparation for p-HSP27 analysis

## Analysis of p-HSP27 (Ser78) levels using Luminex technology

## Sample preparation for cytokine analysis

## Analysis of cytokine levels using Meso Scale Discovery technology

**Supplementary Figure S1**

**Supplementary Table S1**

**Supplementary Table S2**

**Supplementary Table S3**

**Methods**

**ATI-450 bioanalysis assay**

Sample processing was performed by protein precipitation using a 50.0 μL sample volume. Separation between potential metabolites and interfering endogenous compounds was achieved by liquid chromatography with tandem mass spectrometry using a Waters Acquity UPLC BEH C18 column (2.1 x 50 mm, 1.7 μm particle size) at 40°C using 10 mM ammonium formate with 0.3% formic acid as mobile phase A and 50:50:0.3 acetonitrile:methanol:formic acid as mobile phase B, operating at isocratic conditions (with post-elution gradient wash-off) with a flow rate of 0.700 mL/min. A triple quadrupole 6500 mass spectrometer equipped with a turbo-ion spray source was used for detection in positive ion mode. Quantification was based on multiple reaction monitoring of the transitions of m/z 514.3à297.2 for ATI-450 and 517.3à336.2 for the internal standard, ATI-450-13C3. A linear calibration curve ranging from 0.500 to 500 ng/mL with a 1/x2 weighting factor was used. The method was minimally required to have intra‐ and inter-day precision (coefficients of variation) for pooled plasma quality control samples of ≤15% except at the lower limit of quantitation, where ≤20% was acceptable. The calculated concentrations (both inter‐ and intra-day) were required to be within 15% of nominal at all concentrations except the lower limit of quantitation, where up to 20% deviation from nominal was acceptable. The precision and accuracy of the method exceeded these minimum requirements for assay validation. In addition, stability of the analyte in frozen K2-EDTA human plasma was demonstrated for periods exceeding the storage periods of the samples prior to analysis, as well as under all conditions to which study samples or working solutions were subjected.

## Sample preparation for p-HSP27 analysis

For p-HSP27 analysis, 1-mL aliquots of each sample were transferred into six 2-mL microtubes with subsequent treatment designation: “A” for lipopolysaccharide stimulation only (maximum signal), “B” for ex vivo added ATI-450 samples that received lipopolysaccharide stimulation (maximum inhibition), ‘C’ for unstimulated. Treatment groups consisted of 3 tubes for group “A,” 2 tubes for group “B,” and 1 tube for group “C.”

Dimethyl sulfoxide (DMSO) was added to all tubes in groups “A” and “C” to a final concentration of 0.1% (10 mL per mL of a 10% DMSO solution in Dulbecco’s Modified Eagle Medium (DMEM) containing 10% fetal bovine serum (FBS) and 1% penicillin/streptomycin/glutamine). Samples were then rocked gently at room temperature. A stock solution of ATI-450 at 10 mM in 100% DMSO was diluted to 1 mM in DMEM containing 10% FBS and 1% penicillin/streptomycin, and 10 mL of this working solution was added per mL of blood in group “B” samples to give a final concentration of 10 mM in 0.1% DMSO. Samples were then rocked gently at room temperature for a minimum of 1 hour.

Samples in groups “A” and “B” were stimulated with lipopolysaccharide at a final concentration of 100 ng/mL for 22 minutes at room temperature. A stock solution of lipopolysaccharide at 1 mg/mL in DMEM containing 10% FBS and 1% penicillin/streptomycin was diluted to 10 mg/mL in DMEM containing 10% FBS and 1% penicillin/streptomycin, and 10 mL of this working solution was added per mL of blood. Samples were gently rocked at room temperature for 11 minutes, then placed upright for 11 minutes prior to peripheral blood mononuclear cells (PBMC) isolation.

Ten mL of DMEM containing 10% FBS only was added per mL of blood in group “C” for all patient samples (unstimulated samples). Samples were gently rocked at room temperature for 11 minutes, then placed upright for 11 minutes prior to PBMC isolation.

Upon completion of treatment (lipopolysaccharide stimulated or unstimulated) for each sample, PBMCs were isolated from each human whole blood aliquot in all treatment groups. One mL of blood from each sample was gently layered onto 0.75 mL of Histopaque-1077 in a 2-mL microcentrifuge tube. Histopaque-1077 was maintained at room temperature. The samples were centrifuged for 2 minutes at 16,000 x g in an Eppendorf microcentrifuge. The interface and upper layers were removed and added to tubes containing 1 mL cold Dulbecco’s phosphate-buffered saline (DPBS). These samples were then centrifuged for 30 seconds at 16,000 x g in an Eppendorf microcentrifuge to pellet the cells. The buffer supernatant was removed by aspiration and the pellets were re-suspended in 1 mL of cold DPBS. The pellets from each sample were then re-pelleted, as described above. The buffer was removed by aspiration and the final pellets were lysed in 100 mL of complete lysis buffer (MSD Tris lysis buffer, 1X HaltTM Protease inhibitor cocktail, 1X phosphatase inhibitor cocktail 2, 1X phosphatase inhibitor cocktail 3, 2 mM phenylmethylsulfonyl fluoride, 2 mM sodium fluoride and 1 mM sodium vanadate). Samples were vortexed until the cell pellet fully dissolved and then were flash frozen on dry ice.

## Analysis of p-HSP27 (Ser78) levels using Luminex technology

The lysates were analyzed for HSP27 phosphorylation with a custom Milliplex® MAP Human Phospho-HSP27(Ser78) Cell Signaling Magnetic Bead Kit from Millipore Sigma (Burlington, MA) using the kit-prescribed immunoassay protocol for a 96-well solid plate and hand-held magnetic separation block. Once all sample lysates from a given cohort were generated, the lysates were thawed at 4oC and transferred to a round-bottom 96-well polypropylene master plate. A daughter plate consisting of a 2-fold dilution of each lysate (17 mL of lysate plus 17 mL of Milliplex MAP assay buffer 2) was generated for each master plate. The diluted lysates from the daughter plates were used in the assay.

The 96-well, flat-bottom, clear-bottom black plates provided in the kit were prewashed with 50 mL/well of assay buffer 2 for 10 minutes. The wash was decanted and 1X HSP27 magnetic beads in assay buffer 2 were added to each well at 25 mL/well. The diluted lysates from the daughter plates were then added at 25 mL/well. The plates were sealed and incubated overnight at 4oC with shaking in the dark.

After the overnight incubation, using the hand-held magnetic separation block, the samples were decanted and plates were washed 2 times with assay buffer 2. Biotin-labeled detection antibody (1X in assay buffer 2) was added at 25 mL/well to all plates and incubated for 1 hour. All incubations were at room temperature with shaking in the dark. The detection antibody was then decanted using the hand-held magnetic separation block and streptavidin-phycoerythrin (PE; 1X in assay buffer 2) was added to each well at 25 mL/well. The plates were then incubated for 15 minutes. Amplification buffer (1X in assay buffer 2) was added to the streptavidin-PE–containing wells at 25 mL/well and incubated an additional 15 minutes. Using the hand-held magnetic separation block, the streptavidin-PE/amplification buffer was removed by decanting. Assay buffer 2 was added to each well at 150 mL/well. The plates were placed on the plate shaker for a minimum of 5 minutes, then analyzed using the Luminex® 100/200 Instrument (Luminex Corporation, Austin, TX).

## Sample preparation for cytokine analysis

For each sample, 180 mL aliquots were transferred into 7 wells of a round-bottom 96-well tissue culture polystyrene low-evaporation plate. Of the 7 wells for each sample, 3 were designated “A” for lipopolysaccharide stimulation only (maximum signal), 2 were designated “B” for ex vivo added ATI-450 samples that received lipopolysaccharide stimulation (maximum inhibition), and 2 were designated “C” for unstimulated samples. No outer wells on the plates were used and all wells surrounding the samples contained 200 mL of phosphate-buffered saline.

DMSO was added to all wells in groups “A” and “C” to a final concentration of 0.1% (10 mL/well of a 2% DMSO solution in DMEM containing 10% FBS and 1% penicillin/streptomycin/glutamine). A stock solution of ATI-450 at 10 mM in 100% DMSO was diluted to 200 mM in DMEM containing 10% FBS and 1% penicillin/streptomycin, and 10 mL of this working solution was added per well to all wells in group “B” to give a final concentration of 10 mM in 0.1% DMSO. Samples were mixed gently for 30 seconds on a plate shaker using pin tools, then placed in an incubator at 37oC/5% CO2 for 1 hour.

Samples in groups “A” and “B” were stimulated with lipopolysaccharide at a final concentration of 100 ng/mL. A stock solution of lipopolysaccharide at 1 mg/mL in DMEM containing 10% FBS and 1% penicillin/streptomycin was diluted to 2 mg/mL in DMEM containing 10% FBS and 1% penicillin/streptomycin, and 10 mL of this working solution was added per well of blood for all samples in groups “A” and “B.” Ten mL of DMEM containing 10% FBS only was added per well of blood for all samples in group “C” (unstimulated samples). Samples were mixed gently for 30 seconds on a plate shaker using pin tools, then placed in an incubator at 37oC/5% CO2 for 5 hours.

Following the incubation, the plates were removed from the incubator and sealed with adhesive clear plate seals. The plates were then centrifuged for 10 minutes at 1800 x g at room temperature. Seventy-five mL of plasma were removed from each well and transferred to a 96-well, polypropylene, round-bottom master plate, which was then sealed and frozen at −80oC until all samples from the respective cohort were generated. Once all samples from a given cohort were generated, the samples were analyzed for cytokine (TNF-α, IL-1β, IL-6, and IL-8) production using Meso Scale Discovery Technology.

## Analysis of cytokine levels using Meso Scale Discovery technology

All plasma samples were analyzed for cytokine production with a V-Plex Human Proinflammatory Panel II (4-Plex) Kit from Meso Scale Discovery (Rockville, MD). The master plates containing the plasma samples were thawed on ice, and a daughter plate consisting of a 25-fold dilution of each plasma sample (3 mL of plasma plus 72 mL of Meso Scale Discovery Diluent 2) was generated for each master plate. The diluted plasma samples from the daughter plates were used in the cytokine analysis. The Meso Scale Discovery 4-plex plates were washed 3 times with 150 mL/well of wash buffer (1X KPL phosphate-buffered saline with Tween 20 from SeraCare [Milford, MA]). Prepared calibrators and the samples from the daughter plates were added to the washed Meso Scale Discovery 4-plex plates at 50 mL/well. The 4-plex plates were sealed and shaken overnight at 4oC.

After the overnight incubation, the samples were removed by decanting. The 4-plex plates were then washed 3 times with 150 mL of wash buffer per well. A detection antibody mix consisting of sulfo-tagged anti-human IL-1b, sulfo-tagged anti-human IL-6, sulfo-tagged anti-human IL-8, and sulfo-tagged anti-human TNF-a antibodies in Meso Scale Discovery Diluent 3 was added to each well at 25 mL/well, and the plates were sealed and incubated for 2 hours at room temperature with shaking. Following the incubation, the detection antibodies were removed by decanting. The 4-plex plates were washed 3 times with 150 mL/well of wash buffer after which 2X Read Buffer was added at 150 mL/well to all wells. The plates were then read using a Meso Scale Discovery Sector S 600 instrument. Calculations to establish cytokine calibration curves and to determine analyte concentrations in the samples were carried out using the Meso Scale Discovery Workbench analysis software.

**Supplementary Figure S1.** Chemical structure of ATI-450, a recently developed MK2 inhibitor. **Abbreviations:** MK2, MAPK-activated protein kinase 2; MAPK, mitogen-activated protein kinase.


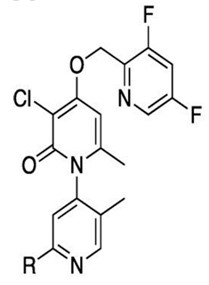


##

## Supplementary Table S1. Statistical analysis of dose proportionality of ATI-450 in SAD cohorts

| **PK Parameter** | **n** | **Intercept** | **Slope** | **90% CI of Slope** |
| --- | --- | --- | --- | --- |
| Cmax (ng/mL) | 24 | 1.302 | 1.006 | (0.902, 1.111) |
| AUC0-t (h*ng/mL) | 23 | 3.113 | 1.088 | (0.997, 1.180) |
| AUC0-inf (h*ng/mL) | 23 | 3.134 | 1.091 | (0.999, 1.184) |

The dose proportionality analyses were performed using the power model: In(PK) = intercept + slope*In(dose) + e, where PK is the PK parameter and e is the error term. A value of slope = 1 indicates dose proportionality. One subject was excluded for the AUC parameters because of withdrawn consent.

**Abbreviations:** AUC, area under the concentration-time curve; Cmax, maximal plasma concentration; CI, confidence interval; n, number of observations; PK, pharmacokinetics; SAD, single ascending dose.

## Supplementary Table S2. Statistical analysis of dose proportionality of ATI-450 in MAD cohorts

| **PK Parameter** | **n** | **Intercept** | **Slope** | **90% CI of Slope** |
| --- | --- | --- | --- | --- |
| Cmax (ng/mL) | 24 | 1.857 | 0.899 | (0.757, 1.042) |
| AUCtau (h*ng/mL) | 24 | 3.292 | 1.019 | (0.872, 1.167) |

The dose proportionality analyses were performed using the power model: In(PK) = intercept + slope*In(dose) + e, where PK is the PK parameter and e is the error term. A value of slope = 1 indicates dose proportionality.

**Abbreviations:** AUC, area under the concentration-time curve; Cmax, maximal plasma concentration; CI, confidence interval; n, number of observations; MAD, multiple ascending dose; PK, pharmacokinetics.

## Supplementary Table S3. Inhibitory Emax model parameters

|  | **p-HSP27** | **TNF-a** | **IL-1b** | **IL-6** | **IL-8** |
| --- | --- | --- | --- | --- | --- |
| IC50, ng/mL | 9.2 | 15.6 | 10.2 | 186.9 | 9.7 |
| IC80,ng/mL | 36.7 | 62.6 | 40.8 | 747.8 | 38.8 |
| Imax, % | 110.6 | 96.5 | 74.3 | 116.4 | 57.1 |

**Abbreviations:** IC50, plasma concentration at half maximal inhibition; IC80, plasma concentration at 80% of maximal inhibition; IL, interleukin; Imax, maximum percent inhibition; p-HSP27, phosphorylated heat shock protein 27; TNF, tumor necrosis factor.
